# Supplementary material
Source: Springer Nature journal article supplement (https://www.springermedizin.de/resource/supplementary/12957_2013_1908_MOESM6_ESM.pdf/9563052)

CT268787  
Jan 20 2009  
08:17:12 AM  
512 X 512

Mag = 1.24  
FL  
ROT:

Se: 2  
Im: 31  
SM 1148.75 Ax  
DFOV 30.8cm  
STNDP-

R  
1  
6  
7

L  
1  
6  
7

kV: 128  
mA: 120  
Large  
5.000mm/27.50 1.375:1  
TR: 0.0

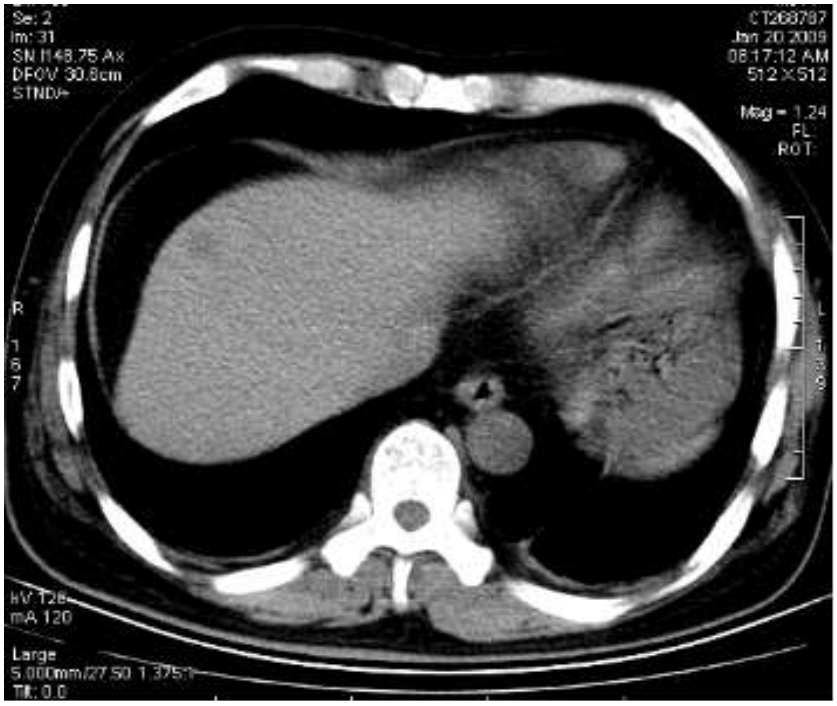

Supplement: MOESM6 [file 9563052]
